# Supplementary material for: Dietary Survey of Japanese Individuals with Type 2 Diabetes Mellitus on a Low-Carbohydrate Diet: An Observational Study
Source: MDPI journal article supplement (doi:10.3390/nu16111658), 2024-05-28
Supplement: s1 [file Table S1.pdf › Table S1.pdf]

**Table S1.** Participant characteristics, including insulin users.

|                                           | Total               | Non-insulin user    | Insulin user        | <i>p</i> -value |
|-------------------------------------------|---------------------|---------------------|---------------------|-----------------|
| n (male)                                  | 388 (254)           | 335 (222)           | 53 (32)             |                 |
| Age (years)                               | 69 (60–74)          | 68 (60–74)          | 71 (65–75)          | 0.078           |
| Duration of diabetes (years)              | 14 (10–19)          | 13 (9–19)           | 18 (15–25)          | <0.001          |
| Duration of low-carbohydrate diet (years) | 10 (5–13)           | 9 (5–13)            | 13 (10–13)          | <0.001          |
| HbA1 (mmol/mol)                           | 50 (46–57)          | 49 (45–55)          | 58 (52–63)          | <0.001          |
| (%)                                       | 6.8 (6.4–7.4)       | 6.7 (6.3–7.2)       | 7.5 (7.0–8.0)       | <0.001          |
| Casual plasma glucose (mg/dL)             | 131 (114–151)       | 131 (114–150)       | 135 (117–159)       | 0.427           |
| BMI (kg/m <sup>2</sup> )                  | 24.1 (21.8–26.8)    | 24.0 (21.8–26.7)    | 24.7 (22.3–28.6)    | 0.291           |
| SBP (mmHg)                                | 125 (117–133)       | 125 (117–133)       | 125 (117–134)       | 0.928           |
| DBP (mmHg)                                | 73 (67–79)          | 73 (67–79)          | 70 (64–77)          | 0.093           |
| TC (mg/dL)                                | 182 (163–204)       | 183 (164–205)       | 174 (160–195)       | 0.182           |
| HDL-C (mg/dL)                             | 61.1 (51.1–75.7)    | 62.6 (51.7–76.4)    | 55.9 (47.7–70.3)    | 0.016           |
| LDL-C (mg/dL)                             | 100.3 (83.9–115.8)  | 101.3 (83.9–117.0)  | 94.9 (82.3–108.1)   | 0.195           |
| TG (mg/dL)                                | 107 (76–152)        | 105 (73–151)        | 119 (86–177)        | 0.083           |
| eGFR (mL/min/1.73m <sup>2</sup> )         | 68.54 (58.88–79.51) | 68.71 (59.21–78.99) | 67.39 (56.18–82.45) | 0.866           |
| ACR (mg/gCr)                              | 15.1 (6.7–46.1)     | 14.5 (6.4–42.9)     | 33.0 (8.4–77.1)     | 0.023           |
| Diabetic retinopathy (%)                  | 15.2                | 11.0                | 41.5                | <0.001          |
| Antidiabetic medication (%)               | 88.1                | 86.2                | 100.0               | 0.001           |
| Antihypertensive medication (%)           | 62.5                | 62.0                | 66.0                | 0.647           |
| Antilipemic medication (%)                | 73.3                | 72.0                | 81.1                | 0.183           |

Drug history was analyzed for 371 patients. The data are expressed as medians (first–third quartiles) or numbers (%).

HbA1c, glycated haemoglobin; BMI, body mass index; SBP, systolic blood pressure; DBP, diastolic blood pressure; TC, total cholesterol; HDL-C, high-density lipoprotein cholesterol; LDL-C, low-density lipoprotein cholesterol; TG, triglyceride; eGFR, estimated glomerular filtration rate; ACR, albumin–creatinine ratio

Non-insulin user vs insulin user (The t-test, Mann–Whitney U test, Fisher’s exact test)

Significance level:  $p < 0.05$
