# Supplementary material for: Dietary Survey of Japanese Individuals with Type 2 Diabetes Mellitus on a Low-Carbohydrate Diet: An Observational Study
Source: MDPI journal article supplement (doi:10.3390/nu16111658), 2024-05-28
Supplement: s1 [file Table S2.pdf › Table S2.pdf]

**Table S2.** Dietary characteristics of participants, including insulin users.

|                            | Crude intake |                    |                    |                    |         | Intake of Energy-adjusted by the density method |                  |                  |                  |         |
|----------------------------|--------------|--------------------|--------------------|--------------------|---------|-------------------------------------------------|------------------|------------------|------------------|---------|
|                            | Unit         | Total              | No-insulin user    | Insulin user       | p-value | Unit                                            | Total            | No-insulin user  | Insulin user     | p-value |
| Energy                     | kcal/day     | 1478 (1171–1829)   | 1457 (1153–1786)   | 1632 (1253–2011)   | 0.057   | –                                               | –                | –                | –                | –       |
|                            | kJ/day       | 6185 (4898–7652)   | 6098 (4825–7474)   | 6827 (5242–8413)   | 0.057   | –                                               | –                | –                | –                | –       |
| Protein                    | g/kgBW/day   | 1.0 (0.8–1.4)      | 1.0 (0.8–1.3)      | 1.2 (0.9–1.5)      | 0.049   | % energy                                        | 18.6 (15.8–21.5) | 18.6 (15.7–21.4) | 18.0 (15.7–22.5) | 0.839   |
| Animal protein             | g/kgBW/day   | 0.6 (0.5–0.9)      | 0.6 (0.5–0.9)      | 0.8 (0.5–1.0)      | 0.116   | % energy                                        | 12.1 (9.5–15.2)  | 12.1 (9.5–15.2)  | 12.4 (9.5–15.3)  | 0.794   |
| Plant protein              | g/kgBW/day   | 0.3 (0.3–0.5)      | 0.3 (0.3–0.4)      | 0.2 (0.3–0.5)      | 0.085   | % energy                                        | 6.3 (5.4–7.2)    | 6.2 (5.3–7.2)    | 6.2 (5.5–7.1)    | 0.967   |
| Fat                        | g/day        | 58.6 (46.7–75.6)   | 56.7 (45.8–75.0)   | 67.3 (49.7–80.1)   | 0.123   | % energy                                        | 36.7 (31.7–42.7) | 36.8 (31.6–43.2) | 36.0 (31.9–40.1) | 0.325   |
| Saturated fatty acid       | g/day        | 15.4 (11.6–20.2)   | 15.1 (11.6–19.6)   | 17.9 (11.8–22.3)   | 0.057   | % energy                                        | 9.6 (8.1–11.1)   | 9.6 (8.1–11.1)   | 9.9 (8.7–11.1)   | 0.865   |
| Monounsaturated fatty acid | g/day        | 21.1 (16.9–27.8)   | 20.9 (16.6–27.7)   | 24.1 (18.7–28.1)   | 0.177   | % energy                                        | 13.3 (11.1–15.6) | 13.3 (11.1–15.7) | 13.0 (11.0–14.9) | 0.216   |
| Polyunsaturated fatty acid | g/day        | 14.3 (11.3–18.3)   | 14.1 (11.1–18.3)   | 14.5 (12.1–18.3)   | 0.376   | % energy                                        | 9.0 (7.4–10.5)   | 9.1 (7.4–10.6)   | 8.5 (7.2–10.2)   | 0.155   |
| Cholesterol                | mg/day       | 449 (294–594)      | 446 (290–590)      | 468 (310–644)      | 0.225   | mg/1000 kcal                                    | 297 (233–381)    | 297 (233–380)    | 291 (235–372)    | 0.814   |
| Available carbohydrate     | g/day        | 121.2 (86.0–170.9) | 119.0 (85.6–162.9) | 137.3 (96.1–193.4) | 0.031   | % energy                                        | 34.9 (26.6–42.5) | 34.6 (26.0–42.4) | 36.6 (27.8–44.0) | 0.293   |
| Total dietary fibre        | g/day        | 10.1 (7.8–13.3)    | 9.8 (7.8–13.0)     | 11.4 (8.7–15.1)    | 0.056   | g/1000 kcal                                     | 7.1 (5.6–8.4)    | 7.1 (5.6–8.4)    | 7.2 (5.3–8.8)    | 0.711   |
| Salt                       | g/day        | 9.5 (7.5–12.0)     | 9.4 (7.5–11.7)     | 10.5 (8.2–13.1)    | 0.027   | g/1000 kcal                                     | 6.5 (5.7–7.5)    | 6.5 (5.6–7.5)    | 6.8 (6.0–7.7)    | 0.310   |
| Alcohol                    | g/day        | 2.5 (0.0–22.1)     | 2.5 (0.0–22.6)     | 0.3 (0.0–21.7)     | 0.387   | g/1000 kcal                                     | 1.5 (0.0–13.4)   | 1.6 (0.0–13.7)   | 0.2 (0.0–12.0)   | 0.303   |

The data are expressed as medians (first–third quartile).

Energy-adjusted values were also calculated using the density method. Protein, fat, and available carbohydrates were calculated as a percentage of daily energy intake. Non-energy nutrients and alcohol were calculated per 1000 kcal of daily energy intake.

BW, body weight; E, energy

Non-insulin user vs insulin user (The t-test, Mann–Whitney U test, or Fisher’s exact test) Significance level:  $p<0.05$
