# Supplementary material for: Dietary Survey of Japanese Individuals with Type 2 Diabetes Mellitus on a Low-Carbohydrate Diet: An Observational Study
Source: MDPI journal article supplement (doi:10.3390/nu16111658), 2024-05-28
Supplement: s1 [file Table S5.pdf › Table S5.pdf]

**Table S5** Comparison by available carbohydrate-to-energy ratio.

|                                           | available carbohydrate-to-energy ratio |                     | <i>p</i> -value |
|-------------------------------------------|----------------------------------------|---------------------|-----------------|
|                                           | < 40%                                  | ≥ 40                |                 |
| Available carbohydrate (%E)               | 29.4 (23.4–34.9)                       | 45.3 (43.0–49.9)    |                 |
| (g/1000kcal)                              | 73.5 (58.6–87.4)                       | 113.2 (107.6–124.8) |                 |
| n (male)                                  | 229 (158)                              | 106 (64)            | 0.136           |
| Age (years)                               | 67 (58–73)                             | 71 (65–78)          | <0.001          |
| Duration of diabetes (years)              | 13 (7–19)                              | 14 (11–20)          | 0.009           |
| Duration of low-carbohydrate diet (years) | 9 (4–13)                               | 11 (7–13)           | <0.001          |
| Protein (%E)                              | 20.2 (17.4–22.4)                       | 16.2 (14.4–17.9)    | <0.001          |
| Animal protein (%E)                       | 13.9 (11.0–16.3)                       | 9.6 (7.7–11.6)      | <0.001          |
| Plant protein (%E)                        | 6.0 (4.9–7.1)                          | 6.5 (6.1–7.2)       | <0.001          |
| Fat (%E)                                  | 40.4 (35.4–45.1)                       | 30.6 (28.0–34.2)    | <0.001          |
| Saturated fatty acid (%E)                 | 10.2 (8.6–11.8)                        | 8.5 (7.2–9.7)       | <0.001          |
| Monounsaturated fatty acid (%E)           | 14.7 (12.9–16.6)                       | 10.9 (9.8–12.3)     | <0.001          |
| Polyunsaturated fatty acid (%E)           | 9.8 (8.4–11.3)                         | 7.2 (6.4–8.2)       | <0.001          |
| Cholesterol (mg/1000kcal)                 | 331 (259–417)                          | 236 (178–295)       | <0.001          |
| Total dietary fibre (g/1000kcal)          | 7.2 (5.5–8.6)                          | 7.0 (5.6–8.2)       | 0.414           |
| Salt (g/1000kcal)                         | 6.7 (5.8–7.6)                          | 6.2 (5.4–7.1)       | 0.002           |
| Alcohol (g/1000kcal)                      | 3.5 (0.0–20.2)                         | 0.0 (0.0–5.3)       | <0.001          |
| HbA1c (mmol/mol)                          | 49 (45–55)                             | 51 (47–56)          | 0.014           |
| (%)                                       | 6.7 (6.3–7.2)                          | 6.9 (6.5–7.3)       | 0.014           |
| Casual plasma glucose (mg/dL)             | 131 (116–149)                          | 128 (110–151)       | 0.370           |
| BMI (kg/m <sup>2</sup> )                  | 23.9 (21.7–26.8)                       | 24.3 (22.2–26.7)    | 0.431           |
| SBP (mmHg)                                | 124 (116–131)                          | 127 (118–135)       | 0.146           |
| DBP (mmHg)                                | 73 (68–79)                             | 72 (66–77)          | 0.207           |
| TC (mg/dL)                                | 185 (165–209)                          | 180 (159–199)       | 0.070           |
| HDL-C (mg/dL)                             | 63.2 (52.2–79.6)                       | 60.3 (50.2–74.1)    | 0.130           |
| LDL-C (mg/dL)                             | 102.5 (85.4–118.1)                     | 99.6 (80.9–114.7)   | 0.274           |
| TG (mg/dL)                                | 103 (72–145)                           | 118 (76–161)        | 0.078           |
| eGFR (mL/min/1.73m <sup>2</sup> )         | 69.95 (60.76–83.04)                    | 63.20 (54.90–74.59) | <0.001          |
| ACR (mg/gCr)                              | 14.9 (6.1–42.7)                        | 13.4 (6.4–42.9)     | 0.716           |
| Diabetic retinopathy (%)                  | 10.9                                   | 11.3                | 1.000           |
| Antidiabetic medication (%)               | 84.7                                   | 89.3                | 0.301           |
| Antihypertensive medication (%)           | 60.0                                   | 66.0                | 0.325           |
| Antilipemic medication (%)                | 70.2                                   | 75.7                | 0.351           |

The data are expressed as medians (first–third quartiles) or numbers (%). HbA1c, glycated haemoglobin; BMI, body mass index; SBP, systolic blood pressure; DBP, diastolic blood pressure; TC, total cholesterol; HDL-C, high-density lipoprotein cholesterol; LDL-C, low-density lipoprotein cholesterol; TG, tri-glyceride; eGFR, estimated glomerular filtration rate; ACR, albumin–creatinine ratio. Energy-adjusted values were also calculated by the density method. Protein, fat, and available

carbohydrate were calculated as a percentage of daily energy intake. Non-energy nutrients and alcohol were calculated per 1000 kcal of daily energy intake. Significance level:  $p < 0.05$ . The  $p$ -value indicates the result of the  $t$ -test, Welch's  $t$ -test, Mann–Whitney U, or Fisher's exact tests.
