# Supplementary material for: Dietary Survey of Japanese Individuals with Type 2 Diabetes Mellitus on a Low-Carbohydrate Diet: An Observational Study
Source: MDPI journal article supplement (doi:10.3390/nu16111658), 2024-05-28
Supplement: s1 [file Tables S3 and S4.pdf › Tables S3 and S4.pdf]

**Table S3.** Dietary characteristics of participants by gender.

|                            | Crude intake |                    |                    | Intake of Energy-adjusted by the density method |                  |                  |
|----------------------------|--------------|--------------------|--------------------|-------------------------------------------------|------------------|------------------|
|                            | Unit         | Male               | Female             | Unit                                            | Male             | Female           |
| Energy                     | kcal/day     | 1556 (1227–1898)   | 1299 (1039–1590)   | –                                               | –                | –                |
|                            | kJ/day       | 6509 (5136–7941)   | 5434 (4349–6653)   | –                                               | –                | –                |
| Protein                    | g/kgBW/day   | 0.9 (0.7–1.3)      | 1.1 (0.8–1.4)      | % energy                                        | 17.8 (15.2–20.7) | 19.6 (17.4–22.1) |
| Animal protein             | g/kgBW/day   | 0.6 (0.5–0.9)      | 0.7 (0.5–1.0)      | % energy                                        | 11.4 (9.1–15.1)  | 12.9 (10.7–15.5) |
| Plant protein              | g/kgBW/day   | 0.3 (0.2–0.4)      | 0.4 (0.3–0.5)      | % energy                                        | 6.1 (5.1–6.9)    | 6.7 (5.9–7.6)    |
| Fat                        | g/day        | 61.7 (48.9–78.1)   | 52.8 (42.2–67.9)   | % energy                                        | 36.2 (30.9–42.8) | 38.3 (32.1–43.5) |
| Saturated fatty acid       | g/day        | 15.5 (11.9–20.6)   | 13.5 (10.9–18.0)   | % energy                                        | 9.4 (8.0–11.0)   | 9.9 (8.3–11.7)   |
| Monounsaturated fatty acid | g/day        | 22.3 (17.6–29.1)   | 19.4 (15.0–24.1)   | % energy                                        | 13.2 (11.0–15.7) | 13.6 (11.5–15.8) |
| Polyunsaturated fatty acid | g/day        | 14.8 (12.0–19.1)   | 13.1 (9.9–15.7)    | % energy                                        | 8.9 (7.3–10.6)   | 9.2 (7.5–10.6)   |
| Cholesterol                | mg/day       | 454 (290–597)      | 419 (288–567)      | mg/1000 kcal                                    | 287 (219–373)    | 311 (250–387)    |
| Available carbohydrate     | g/day        | 125.4 (85.5–173.3) | 114.6 (85.7–150.2) | % energy                                        | 33.9 (25.4–41.5) | 35.3 (28.9–43.4) |
| Total dietary fibre        | g/day        | 9.5 (7.7–12.7)     | 10.5 (8.2–13.6)    | g/1000 kcal                                     | 6.5 (5.6–7.5)    | 8.0 (6.8–9.7)    |
| Salt                       | g/day        | 9.8 (7.8–12.2)     | 8.0 (6.8–10.8)     | g/1000 kcal                                     | 6.4 (5.6–7.4)    | 6.5 (5.7–7.5)    |
| Alcohol                    | g/day        | 8.3 (0.0–33.2)     | 0.0 (0.0–3.8)      | g/1000 kcal                                     | 4.7 (0.0–20.5)   | 0.0 (0.0–2.4)    |

The data are expressed as medians (first–third quartile).

Energy-adjusted values were also calculated using the density method. Protein, fat, and available carbohydrates were calculated as a percentage of daily energy intake. Non-energy nutrients and alcohol were calculated per 1000 kcal of daily energy intake.

BW, body weight

**Table S4** Age-adjusted eGFR for each available carbohydrate interquartile range.

|                                   | Q1                  | Q2                  | Q3                  | Q4                  |         |
|-----------------------------------|---------------------|---------------------|---------------------|---------------------|---------|
| <b>Age ≤ 68 years</b>             |                     |                     |                     |                     |         |
| Available carbohydrate (%E)       | 20.7 (17.1–23.9)    | 30.2 (28.1–32.0)    | 38.5 (36.2–39.8)    | 47.7 (45.2–53.1)    |         |
| (g/1000kcal)                      | 68.6 (43.2–84.6)    | 112.3 (89.9–143.7)  | 139.8 (10.9–181.8)  | 177.9 (146.2–246.7) |         |
| n (male)                          | 46 (30)             | 48 (34)             | 45 (35)             | 33 (24)             |         |
| Age (years)                       | 58 (52–62)          | 59 (53–65)          | 61 (54–66)          | 63 (55–67)          | 0.070   |
| eGFR (mL/min/1.73m <sup>2</sup> ) | 80.47 (69.14–91.27) | 74.35 (65.29–84.60) | 69.05 (59.74–80.04) | 70.64 (57.49–77.64) | 0.003†‡ |
| <b>Age &gt; 68 years</b>          |                     |                     |                     |                     |         |
| Available carbohydrate (%E)       | 22.3 (16.2–24.6)    | 30.4 (29.2–33.6)    | 38.3 (36.6–40.3)    | 46.1 (43.4–49.9)    |         |
| (g/1000kcal)                      | 79.8 (55.7–96.7)    | 99.8 (85.8–120.3)   | 139.4 (112.8–174.5) | 170.8 (132.8–205.4) |         |
| n (male)                          | 37 (7)              | 36 (22)             | 39 (21)             | 51 (26)             |         |
| Age (years)                       | 74 (71–77)          | 74 (71–78)          | 74 (72–83)          | 76 (73–81)          | 0.092   |
| eGFR (mL/min/1.73m <sup>2</sup> ) | 60.38 (50.42–73.41) | 68.52 (58.34–79.40) | 66.53 (53.22–76.76) | 61.11 (54.11–68.63) | 0.144   |

The data are expressed as medians (first–third quartiles).

Q1, first quartile; Q2, second quartile; Q3, third quartile; Q4, fourth quartile; eGFR, estimated glomerular filtration rate

Significance level:  $p < 0.05$

The  $p$  value indicates the result of the Kruskal-Wallis test.

\*, Q1vsQ2; †, Q1vsQ3; ‡, Q1vsQ4; §, Q2vsQ3; ||, Q2vsQ4; ¶, Q3vsQ4, Correction by Tukey-Kramer or Steel-Dwass
